# Supplementary material
Source: Springer Nature journal article supplement (https://www.springermedizin.de/resource/supplementary/12936_2007_512_MOESM3_ESM.pdf/9548150)

■ Severe malaria    ■ Uncomplicated malaria    ■ Non-malaria admissions

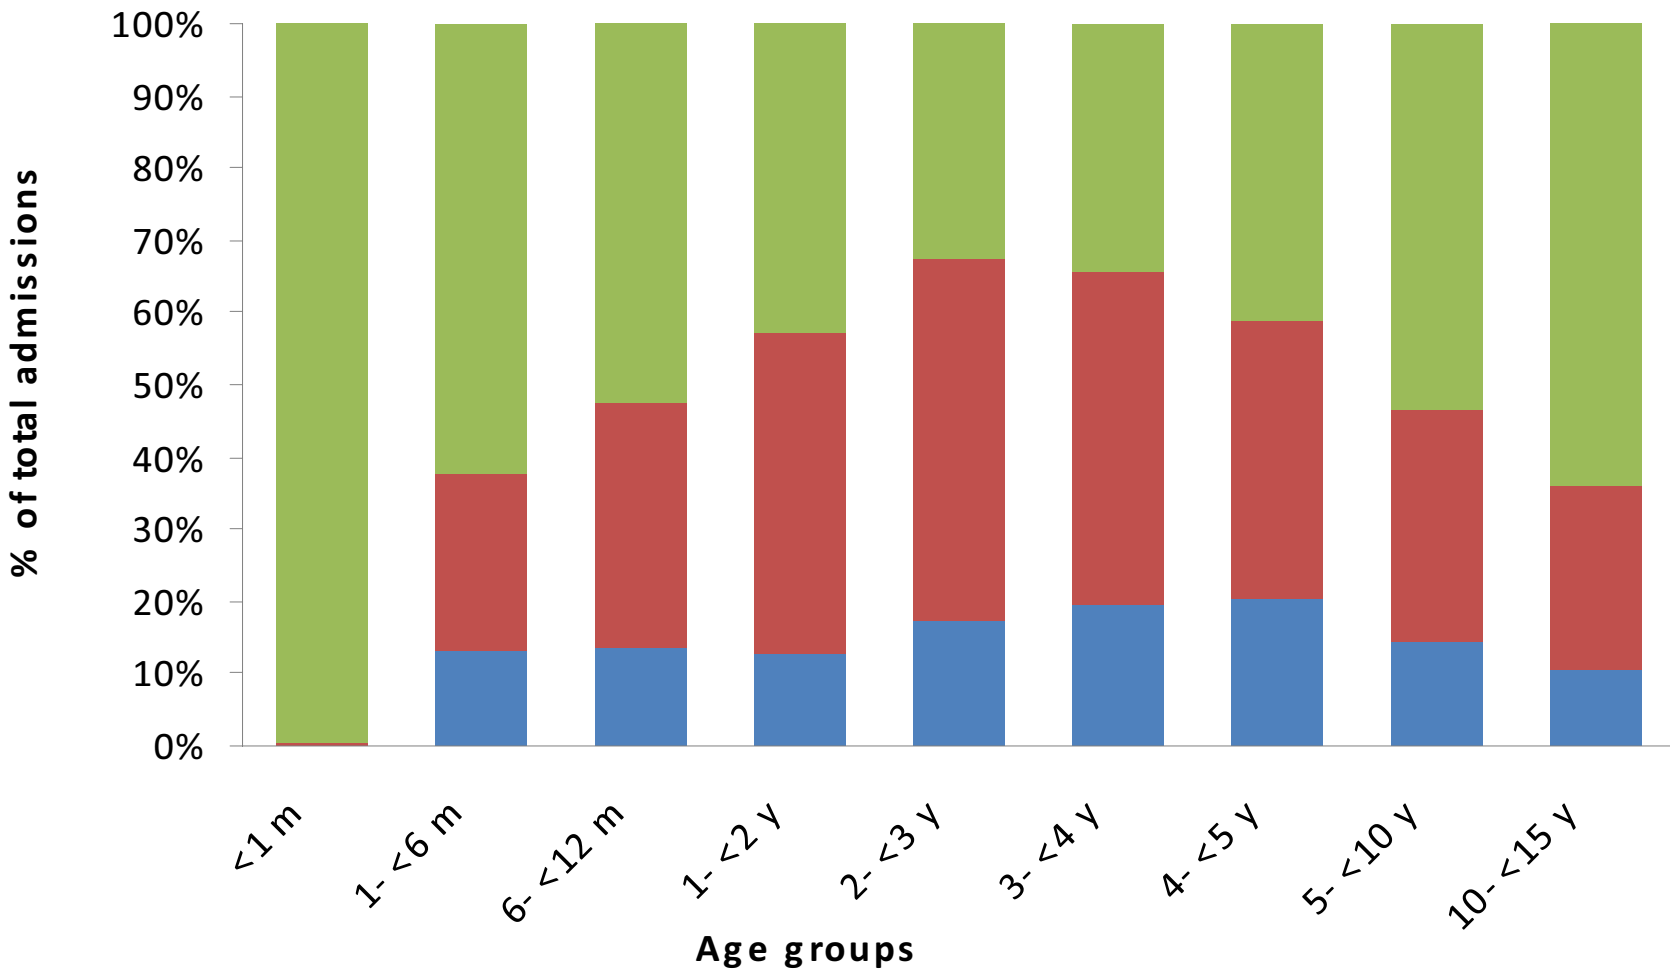

Supplement: MOESM3 [file 9548150]
